# Supplementary material for: Molecular Genetic Diversity of Local and Exotic Durum Wheat Genotypes and Their Combining Ability for Agronomic Traits under Water Deficit and Well-Watered Conditions
Source: MDPI journal article supplement (doi:10.3390/life13122293), 2023-12-01
Supplement: s1 [file s1]

Table S1. Name, pedigree and origin of eight durum wheat genotypes used in the present study.

| No | Parent name | Pedigree                                                                                                                                                                        | Origin |
|----|-------------|---------------------------------------------------------------------------------------------------------------------------------------------------------------------------------|--------|
| 1  | W988        | ZENIT/5/SORA/2*PLATA-12//RASCON_37/4/ARMENT//SRN_3/NIGRIS_4/3/<br>CANELO_9.1/6/MINIMUS_4/GRO_2/3/PROZANA<br>/ARLIN//MUSK_6/5/SULA/RBCE_2/3/HUI//CIT71/<br>CII/4/RYP27_3/SKARV_3 | CIMMYT |
| 2  | W994        | ARMENT//SRN_3/NIGRIS_4/3/CANELO_9.1/4/STT<br>//ALTAR84/ALD/3/PATKA_7/YAZI_1/5/HUALITA                                                                                           | CIMMYT |
| 3  | W996        | TRIDENT/3*KUCUK                                                                                                                                                                 | CIMMYT |
| 4  | W1011       | CIRNO C 2008/3/KNIPA/TAGUA//PLANETA/TRILE                                                                                                                                       | CIMMYT |
| 5  | W1518       | COPIO/3/ATTILA*2/PBW65*2//KACHU/4/NELOKI                                                                                                                                        | CIMMYT |
| 6  | W1520       | KSW/SAUAL//SAUAL/3/TRCH/HUIRIVIS #1/5/UP2338<br>*2/SHAMA/3/MILAN/KAUZ//CHIL/<br>CHUM18/4/UP2338*2/SHAMA                                                                         | CIMMYT |
| 7  | Bani-Suef 5 | Dipperz/bushen3<br>CDSS92B128-1M-0Y-0M-0Y-3B-0Y-0SD                                                                                                                             | Egypt  |
| 8  | Bani-Suef 7 | CBC509CHILE//SOOTY_9/RASCON_37/9/USDA595/3/D67.3RABI//CRA/4/ALO/5/HUI/<br>YAV_1/6/ARDENTE/7/HUI/YAV79/8/POD_9.<br>CDSS02-Y01233T-0T0PB-0Y-0M-26Y-0Y-0SD.                        | Egypt  |

**Table S2.** Main soil physico-chemical analysis before wheat cultivation at the experimental site.

| Depth<br>(cm) | Sand<br>(%) | Silt<br>(%)                           | Clay<br>(%) | texture | $\theta_s$<br>(%)                     | LL<br>(%) | DUL<br>(%)                            | OC<br>(%) | qb<br>(g cm <sup>-3</sup> ) | Ks<br>(cm h <sup>-1</sup> ) |
|---------------|-------------|---------------------------------------|-------------|---------|---------------------------------------|-----------|---------------------------------------|-----------|-----------------------------|-----------------------------|
| 0-20          | 16.0        | 30.1                                  | 53.9        | clay    | 62.7                                  | 22.0      | 40.6                                  | 0.8       | 1.20                        | 0.40                        |
| 20-40         | 15.5        | 32.5                                  | 52.0        | Clay    | 65.2                                  | 21.5      | 40.5                                  | 0.7       | 1.22                        | 0.38                        |
| 40-60         | 14.5        | 37.0                                  | 48.5        | clay    | 65.5                                  | 21.0      | 41.2                                  | 0.5       | 1.23                        | 0.31                        |
|               | pH          | Available N<br>(mg kg <sup>-1</sup> ) |             |         | Available P<br>(mg kg <sup>-1</sup> ) |           | Available K<br>(mg kg <sup>-1</sup> ) |           | OM<br>(%)                   |                             |
| 0-20          | 8.0         | 35.2                                  |             |         | 10.5                                  |           | 620                                   |           | 1.37                        |                             |
| 20-40         | 7.8         | 32.5                                  |             |         | 9.5                                   |           | 602                                   |           | 1.21                        |                             |
| 40-60         | 8.2         | 28.9                                  |             |         | 9.2                                   |           | 585                                   |           | 0.86                        |                             |

$\theta_s$ : saturation percentage (%), LL: wilting point (%), DUL: field capacity (%), OC: organic carbon (%),  
qb: bulk density, K<sub>s</sub>: saturated hydraulic conductivity, OM: organic matter

Table S3. Estimates of heterosis relative to the better parent (Heterobeltiosis) for all the studied traits under the two irrigation treatments.

| Cross | Days to heading |         | Plant height (cm) |         | Spike length (cm) |          | No. of spikelets/spike |          |
|-------|-----------------|---------|-------------------|---------|-------------------|----------|------------------------|----------|
|       | Normal          | Stress  | Normal            | Stress  | Normal            | Stress   | Normal                 | Stress   |
| P1×P2 | -3.06*          | -7.84** | 4.90*             | 11.15** | -0.37             | 7.77*    | 3.67                   | 4.00     |
| P1×P3 | -3.11*          | -5.88** | -0.98             | 4.35    | 0.75              | -11.48** | -1.39                  | -2.72    |
| P1×P4 | -0.95           | -4.90** | 1.31              | 7.43**  | -10.18**          | -4.83    | -3.13                  | -5.65    |
| P1×P5 | -1.90           | -4.25** | -6.86**           | -0.74   | -8.24**           | -11.46** | 2.01                   | -2.30    |
| P1×P6 | -1.90           | -6.54** | -3.59             | 1.82    | -13.11**          | -5.73    | -3.44                  | -6.10    |
| P1×P7 | -1.27           | -5.88** | -6.03*            | -5.78*  | -7.67**           | -11.84** | -3.14                  | -11.64** |
| P1×P8 | -2.64           | -2.61   | -6.69*            | 0.74    | -4.49             | -2.34    | -8.10**                | -13.64** |
| P2×P3 | 3.06*           | 0.00    | 2.73              | 1.09    | 0.75              | 7.66*    | 2.75                   | 11.05**  |
| P2×P4 | -3.36*          | 0.00    | 2.41              | 3.36    | -4.21             | 9.66**   | 6.10                   | 1.59     |
| P2×P5 | -4.89**         | -0.33   | 2.44              | 0.75    | 5.62*             | 4.66     | 4.74                   | 4.36     |
| P2×P6 | -1.22           | -3.62*  | 1.35              | 1.09    | 0.75              | -0.52    | 3.15                   | -3.39    |
| P2×P7 | 1.22            | -3.62*  | -5.40*            | -6.80** | 0.33              | -8.77**  | -2.14                  | -4.92    |
| P2×P8 | -3.36*          | -6.91** | -0.70             | -2.61   | 3.37              | -9.81**  | 1.68                   | -3.25    |
| P3×P4 | -2.80*          | -1.99   | -1.71             | -3.62   | 5.96**            | -7.18*   | 3.42                   | -2.83    |
| P3×P5 | -4.66**         | -4.30** | 1.37              | -1.09   | 3.57              | -7.66*   | 0.47                   | -4.71    |
| P3×P6 | -2.17           | -6.62** | 0.67              | -0.36   | 13.10**           | -9.57**  | 2.29                   | -6.10    |
| P3×P7 | -4.35**         | -3.97** | -5.08*            | -3.74   | 0.67              | -5.26    | -2.71                  | -5.08    |
| P3×P8 | -3.42*          | -2.32   | 2.73              | 0.00    | 6.37**            | -1.40    | -5.31                  | -9.58**  |
| P4×P5 | -1.95           | -0.35   | -0.69             | -0.38   | -7.37**           | -10.14** | -2.83                  | -8.13*   |
| P4×P6 | -0.65           | -1.72   | 1.35              | 0.73    | -3.86             | -5.31    | -2.01                  | -3.56    |
| P4×P7 | -3.50*          | -2.05   | -0.63             | -1.70   | -2.33             | -8.77**  | -0.57                  | -9.18**  |
| P4×P8 | -4.56**         | -2.38   | 1.72              | 3.02    | -2.11             | -11.68** | -12.01**               | -9.74**  |
| P5×P6 | 0.33            | -1.72   | -4.04             | -4.38   | 0.84              | -12.50** | -6.02                  | -10.85** |
| P5×P7 | -3.82**         | -0.34   | -6.35**           | -6.46** | -4.00             | -2.63    | -6.42*                 | -12.46** |
| P5×P8 | 3.30*           | 5.10**  | 2.46              | -2.66   | 5.62*             | 4.21     | -6.28*                 | -16.72** |
| P6×P7 | -0.64           | -2.74   | -5.40*            | -7.48** | -8.00**           | -8.33**  | -0.43                  | -6.07    |
| P6×P8 | -0.98           | -5.44** | -2.36             | -2.55   | 0.37              | -6.07*   | -4.75                  | -12.01** |
| P7×P8 | -4.55**         | -3.06*  | -7.30**           | -7.82** | -9.67**           | -6.14*   | -5.59                  | -9.74**  |

Table S3. Cont.

| Cross | No. of spikes /plant |         | No. of kernels / spike |          | 1000-kernel weight<br>(g) |         | Grain yield/plant<br>(g) |          |
|-------|----------------------|---------|------------------------|----------|---------------------------|---------|--------------------------|----------|
|       | Normal               | Stress  | Normal                 | Stress   | Normal                    | Stress  | Normal                   | Stress   |
| P1×P2 | -3.57                | -2.08   | 9.72*                  | 5.70     | 13.79*                    | 14.39*  | 34.17**                  | 24.76**  |
| P1×P3 | 7.02                 | 6.25    | -6.88                  | -7.89    | 10.34                     | 11.36   | 15.52**                  | -0.98    |
| P1×P4 | 0.00                 | 0.00    | -11.16*                | -10.73*  | 6.90                      | 3.79    | -0.92                    | -13.68** |
| P1×P5 | 15.91*               | 18.92*  | -20.24**               | -17.54** | 4.14                      | 4.55    | 32.99**                  | 39.74**  |
| P1×P6 | -1.79                | -4.08   | -3.80                  | -9.50*   | 5.00                      | -1.33   | 22.70**                  | 7.83*    |
| P1×P7 | -1.52                | -20.00* | 0.71                   | -1.54    | 2.35                      | -4.40   | 13.73**                  | 12.50**  |
| P1×P8 | 11.76                | -1.59   | 7.84                   | 1.61     | 0.00                      | -1.82   | 9.27**                   | 7.38*    |
| P2×P3 | -5.26                | -6.25   | 2.46                   | 4.46     | 12.59*                    | 17.05** | 22.50**                  | 7.62*    |
| P2×P4 | 10.71                | 10.42   | 1.20                   | 3.86     | 3.52                      | 3.91    | 11.67**                  | 0.00     |
| P2×P5 | 0.00                 | -4.17   | -3.28                  | -1.34    | 8.45                      | 6.25    | 10.83**                  | -1.90    |
| P2×P6 | 12.50                | 16.33   | -1.14                  | -1.24    | 6.25                      | 4.67    | 8.51**                   | 13.91**  |
| P2×P7 | 1.52                 | -6.67   | 3.53                   | 2.31     | 7.65                      | 6.29    | 11.11**                  | 22.50**  |
| P2×P8 | 4.41                 | -1.59   | 9.02*                  | 4.02     | -6.99                     | -3.64   | 9.27**                   | 18.85**  |
| P3×P4 | 1.75                 | 6.25    | -4.38                  | -4.72    | 11.19                     | 12.40*  | 19.83**                  | 8.82*    |
| P3×P5 | 18.77*               | 16.67*  | 9.33*                  | 15.00**  | 10.49                     | 9.30    | 24.14**                  | 17.65**  |
| P3×P6 | 8.77                 | 12.24   | 6.08                   | 7.85     | 5.00                      | 0.67    | 19.15**                  | 12.17**  |
| P3×P7 | 7.58                 | 0.00    | 1.77                   | 2.69     | 4.71                      | 3.77    | 10.46**                  | 13.33**  |
| P3×P8 | 2.94                 | 1.59    | 10.59*                 | 5.22     | -5.91                     | -2.42   | 7.28*                    | 8.20**   |
| P4×P5 | 45.65**              | 43.24** | 3.98                   | 5.58     | 15.71*                    | 15.75*  | 27.52**                  | 15.79**  |
| P4×P6 | 7.14                 | 8.16    | 2.28                   | 7.02     | 6.25                      | 5.33    | 22.70**                  | 33.04**  |
| P4×P7 | 1.52                 | -3.33   | 11.31**                | 6.54     | 6.47                      | 7.55    | 13.07**                  | 15.83**  |
| P4×P8 | 4.41                 | 0.00    | 14.90**                | 7.23     | -4.84                     | -2.42   | 11.26**                  | 14.75**  |
| P5×P6 | 1.79                 | 4.08    | -4.18                  | -7.85    | -5.00                     | -10.67* | -17.02**                 | -18.26** |
| P5×P7 | -3.03                | -5.00   | -0.35                  | 2.31     | 7.06                      | 6.29    | 10.46**                  | 9.17**   |
| P5×P8 | 13.24                | 4.76    | 16.86**                | 4.02     | -6.45                     | -1.82   | 8.61**                   | 13.11**  |
| P6×P7 | 0.00                 | 6.67    | 2.83                   | 6.92     | -2.94                     | -5.66   | 18.30**                  | 19.17**  |
| P6×P8 | 11.76                | 6.35    | 10.27*                 | 12.05**  | -5.91                     | 0.61    | 15.23**                  | 31.97**  |
| P7×P8 | 19.12*               | 15.87*  | 0.35                   | 6.15     | 2.69                      | 7.27    | 18.30**                  | 38.52**  |

\* and \*\* significant at 0.05 and 0.01 levels of probability, respectively.

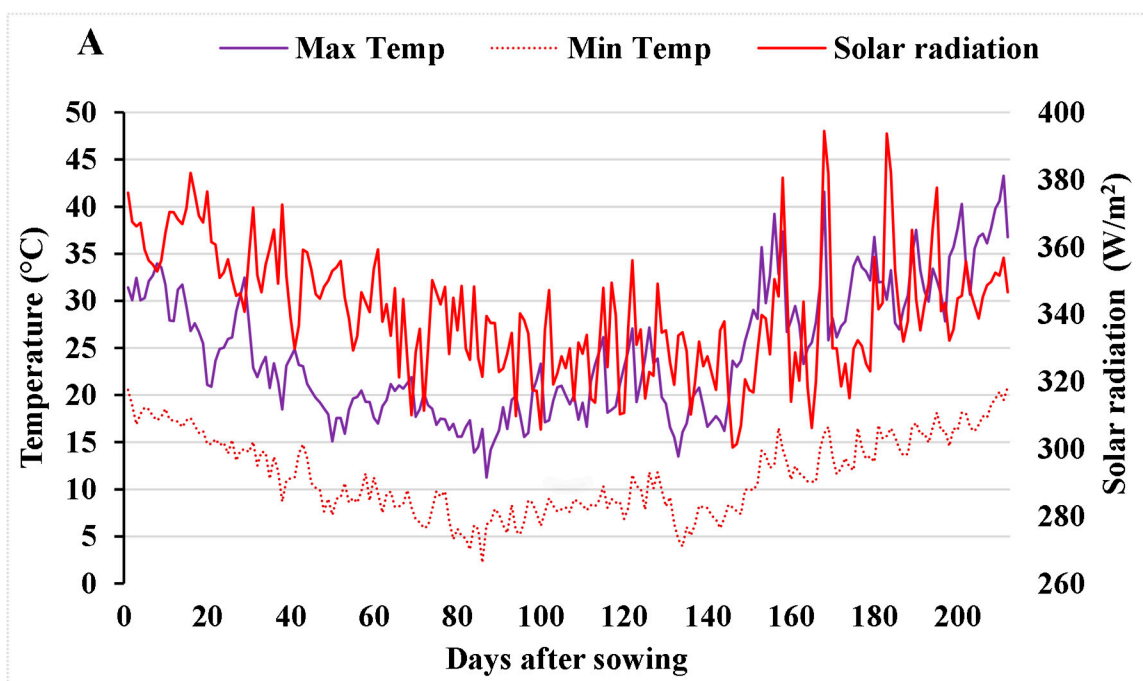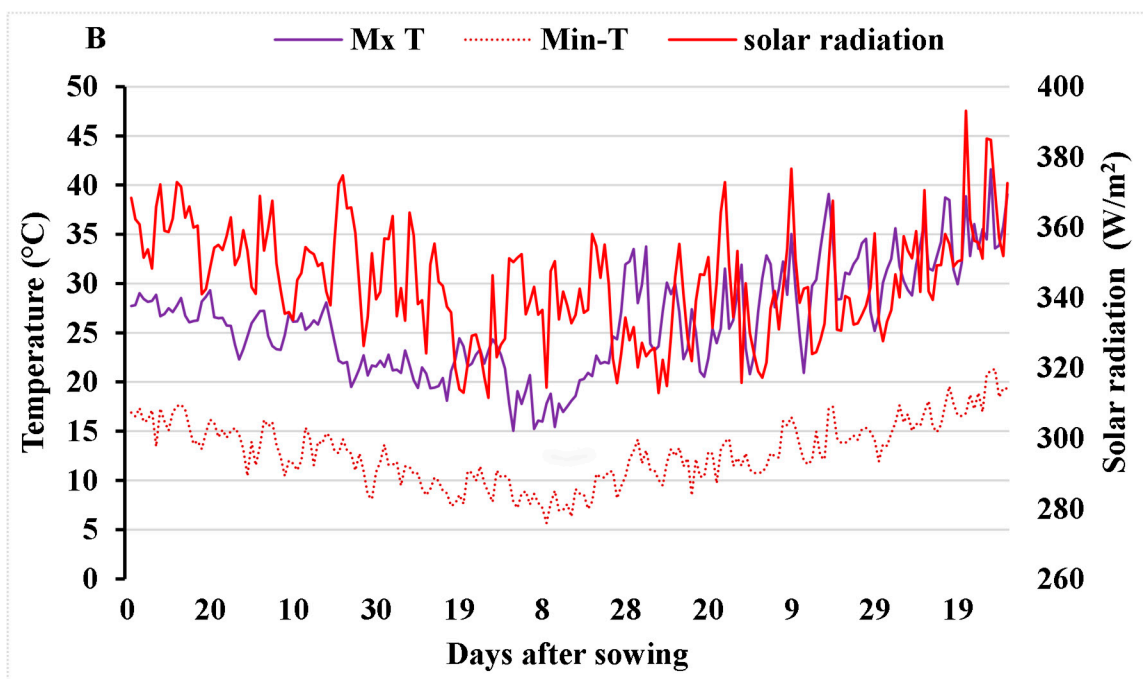

**Figure S1.** Minimum temperature, maximum temperature and Solar radiation at experimental site during first (A) and second (B) seasons.

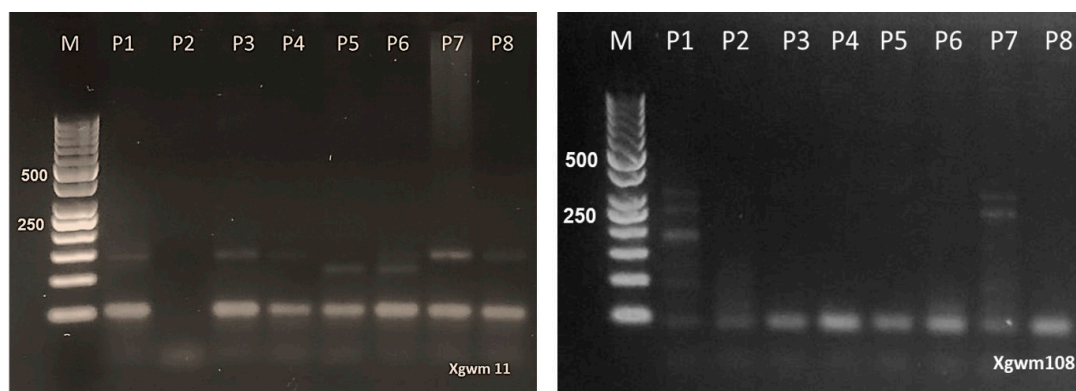

**Figure S2.** Electrophoresed gel image of the simple sequence repeat (SSR) markers: Xgwm 11 and Xgwm 108.
